# Supplementary material for: Is the Course of Headache Complaints Related to the Course of Orofacial Pain and Disability in Patients Treated for Temporomandibular Pain? An Observational Study
Source: MDPI journal article supplement (doi:10.3390/app11177780), 2021-08-24
Supplement: s1 [file s1]

Archive with 1 entries (1 files):
- applsci-1318904-supplementary.pdf
